# Supplementary material for: Photonics of Trimethine Cyanine Dyes as Probes for Biomolecules
Source: MDPI journal article supplement (doi:10.3390/molecules27196367), 2022-09-27
Supplement: s1 [file s1]

**Supplementary Materials**  
**of the review of P.G. Pronkin and A.S. Tatikolov “Photonics of Trimethine Cyanine Dyes as**  
**Probes for Biomolecules”**

**N.M. Emanuel Institute of Biochemical Physics, Russian Academy of Sciences, Kosygin St. 4, Moscow,**  
**119334 Russia**

*Corresponding authors: Pavel G. Pronkin pronkinp@gmail.com*

*Alexander.S. Tatikolov tatikolov@mail.ru*

**Table S1.** Spectral-fluorescent properties of trimethine cyanine dyes in a complex with DNA (in the presence of high concentrations of DNA): maxima of the absorption and fluorescence spectra  $\lambda_{\text{abs}}(\text{DNA})$  and  $\lambda_{\text{fl}}(\text{DNA})$ , respectively, spectral shifts upon the interaction with DNA  $\Delta\lambda_{\text{abs}}$  and  $\Delta\lambda_{\text{fl}}$ , ratios of fluorescence intensities/quantum yields in the presence and in the absence of DNA  $I_{\text{fl}}(\text{DNA})/I_{\text{fl}0}$  or  $\Phi_{\text{fl}}(\text{DNA})/\Phi_{\text{fl}0}$ ; as well as dye–DNA binding constants  $K_{\text{b}}$  and limits of detection/quantification of DNA LOD/LOQ using the dyes as probes

| Dye | $\lambda_{\text{abs}}(\text{DNA})$<br>( $\sim\Delta\lambda_{\text{abs}}$ ) | $\lambda_{\text{fl}}(\text{DNA})$<br>( $\sim\Delta\lambda_{\text{fl}}$ ) | $I_{\text{fl}}(\text{DNA})/I_{\text{fl}0}$<br>$\Phi_{\text{fl}}(\text{DNA})/\Phi_{\text{fl}0}$ | $K_{\text{b}}$                 | LOD/LOQ              | Ref.         |
|-----|----------------------------------------------------------------------------|--------------------------------------------------------------------------|------------------------------------------------------------------------------------------------|--------------------------------|----------------------|--------------|
|     | nm                                                                         |                                                                          |                                                                                                | L mol <sup>-1</sup>            | μmol L <sup>-1</sup> |              |
| 1   | 541 (6)                                                                    | 563 (-1)                                                                 | 177.6                                                                                          | $4.8 \times 10^5$              | –                    | [24, 27, 40] |
| 2   | 554 (3)                                                                    | 577 (8)                                                                  | 4.59                                                                                           | $9.5 \times 10^4$              | –                    | [27, 32, 33] |
| 4   | 551 (-2)                                                                   | 651 (-6)                                                                 | 2.59                                                                                           | –                              | –                    |              |
| 5   | 558 (10)                                                                   | 644 (1)                                                                  | 45.0                                                                                           | –                              | –                    |              |
| 6   | 551 (50)                                                                   | 632 (-4)                                                                 | 2.36                                                                                           | –                              | –                    |              |
| 7   | 561 (34)                                                                   | 587 (9)                                                                  | 70.9                                                                                           | –                              | –                    |              |
| 8   | 558 (0)                                                                    | 596 (-119)                                                               | 71.0                                                                                           | –                              | –                    |              |
| 9   | 501 (5)                                                                    | 604 (-25)                                                                | 5.87                                                                                           | –                              | –                    | [27]         |
| 10  | 506 (6)                                                                    | 583 (-72)                                                                | 207.4                                                                                          | –                              | –                    |              |
| 11  | 505 (2)                                                                    | 583 (-89)                                                                | 222.0                                                                                          | –                              | –                    |              |
| 12  | 557 (30)                                                                   | 627 (-5)                                                                 | 127.7                                                                                          | –                              | –                    |              |
| 13  | 515 (-13)1                                                                 | 637 (8)                                                                  | 5.28                                                                                           | –                              | –                    |              |
| 15  | 575 (11)                                                                   | 582 (8)                                                                  | 23.0                                                                                           | $\sim 10^6 \sim 5 \times 10^4$ | –                    | [29]         |
| 18  | 566 (5)                                                                    | 586 (1)                                                                  | 8.21                                                                                           | $1.2 \times 10^5$              | $\sim 0.2$           |              |
| 19  | 554 (10)                                                                   | 567 (3)                                                                  | 263.0                                                                                          | $1.24 \times 10^5$             | $\sim 0.022$         |              |
| 20  | 565 (6)                                                                    | 581 (5)                                                                  | 10                                                                                             | $1.2 \times 10^5$              | $\sim 1$             | [30, 31]     |
| 21  | 568(8)                                                                     | 580 (6)                                                                  | 6.67                                                                                           | $3.7 \times 10^4$              | $\sim 2.7$           |              |

| Dye | $\lambda_{\text{abs}}(\text{DNA})$<br>( $\sim\Delta\lambda_{\text{abs}}$ ) | $\lambda_{\text{fl}}(\text{DNA})$<br>( $\sim\Delta\lambda_{\text{fl}}$ ) | $I_{\text{fl}}(\text{DNA})/I_{\text{fl}0}$<br>$\Phi_{\text{fl}}(\text{DNA})/\Phi_{\text{fl}0}$ | $K_b$                    | LOD/LOQ              | Ref.    |
|-----|----------------------------------------------------------------------------|--------------------------------------------------------------------------|------------------------------------------------------------------------------------------------|--------------------------|----------------------|---------|
|     | nm                                                                         |                                                                          |                                                                                                | L mol <sup>-1</sup>      | μmol L <sup>-1</sup> |         |
| 22  | 695 (23)                                                                   | 575 (23)                                                                 | 3                                                                                              | –                        | –                    | [34]    |
| 23  | 581 (-)                                                                    | 618 (-)                                                                  | 150                                                                                            | –                        | –                    | [35]    |
| 24  | 610 (-)                                                                    | 651 (-)                                                                  | 140                                                                                            | –                        | –                    |         |
| 26  | 538 (-1)                                                                   | 565 (-5)                                                                 | 15                                                                                             | –                        | –                    |         |
| 27  | 501 (6)                                                                    | 525 (1)                                                                  | 9                                                                                              | –                        | –                    | [38–41] |
| 28  | 550(5)                                                                     | 665 (2)                                                                  | 87                                                                                             | –                        | –                    |         |
| 29  | 499 (13)                                                                   | 513 (8)                                                                  | 55                                                                                             | –                        | –                    |         |
| 30  | 504 (11)                                                                   | 518 (7)                                                                  | 41                                                                                             | –                        | –                    |         |
| 31  | 515 (12)                                                                   | 522 (10)                                                                 | 2.6                                                                                            | –                        | –                    |         |
| 38  | –                                                                          | 514 (10)                                                                 | 27.7                                                                                           | –                        | –                    | [45]    |
| 39  | –                                                                          | 603 (6)                                                                  | 13.4                                                                                           | –                        | –                    |         |
| 40  | –                                                                          | 565 (-3)                                                                 | 132.1                                                                                          | –                        | –                    |         |
| 41  | –                                                                          | 573 (4)                                                                  | 60.7                                                                                           | –                        | –                    |         |
| 42  | –                                                                          | 449 (-131)                                                               | 46.8                                                                                           | –                        | –                    |         |
| 43  | –                                                                          | 701 (45)                                                                 | ~0.9                                                                                           | –                        | –                    |         |
| 44  | –                                                                          | 637 (-35)                                                                | 76                                                                                             | –                        | –                    |         |
| 45  | –                                                                          | 615 (-27)                                                                | 5.6                                                                                            | –                        | –                    |         |
| 46  | –                                                                          | 628 (-4)                                                                 | 12.3                                                                                           | –                        | –                    |         |
| 47  | –                                                                          | 652 (10)                                                                 | 9.9                                                                                            | –                        | –                    |         |
| 50  | 571 (37)                                                                   | 602 (12)                                                                 | 72                                                                                             | 8.8/2.6× 10 <sup>5</sup> | –                    | [48–50] |

**Table S2.** Spectral-fluorescent properties of trimethine cyanine dyes in a complex with BSA (in the presence of high concentrations of BSA): maxima of the absorption and fluorescence spectra  $\lambda_{\text{abs}}(\text{BSA})$  and  $\lambda_{\text{fl}}(\text{BSA})$ , respectively, spectral shifts upon the interaction with BSA  $\Delta\lambda_{\text{abs}}$  and  $\Delta\lambda_{\text{fl}}$ , ratios of fluorescence intensities /quantum yields in the presence and in the absence of BSA  $I_{\text{fl}}(\text{BSA})/I_{\text{fl}0}$  or  $\Phi_{\text{fl}}(\text{BSA})/\Phi_{\text{fl}0}$ ; as well as dye–BSA binding constants  $K_{\text{b}}$  and limits of detection/quantification of BSA LOD/LOQ using the dyes as probes

| Dye | $\lambda_{\text{abs}}(\text{BSA})$<br>( $\sim\Delta\lambda_{\text{abs}}$ ) | $\lambda_{\text{fl}}(\text{BSA})$<br>( $\sim\Delta\lambda_{\text{fl}}$ ) | $I_{\text{fl}}(\text{BSA})/I_{\text{fl}0}$<br>$\Phi_{\text{fl}}(\text{BSA})/\Phi_{\text{fl}0}$ | $K_{\text{b}}$            | LOD/LOQ             | Ref  |
|-----|----------------------------------------------------------------------------|--------------------------------------------------------------------------|------------------------------------------------------------------------------------------------|---------------------------|---------------------|------|
|     | nm                                                                         | nm                                                                       |                                                                                                | L mol <sup>-1</sup>       | μg mL <sup>-1</sup> |      |
| 1   | 535 (0)                                                                    | 572 (8)                                                                  | 0.22                                                                                           | –                         | –                   | [27] |
| 2   | 551 (-3)                                                                   | 572 (-5)                                                                 | 0.002                                                                                          | –                         | –                   |      |
| 4   | 562 (9)                                                                    | 661 (4)                                                                  | 3.57                                                                                           | –                         | –                   |      |
| 5   | 577 (29)                                                                   | 668 (25)                                                                 | 21.5                                                                                           | –                         | –                   |      |
| 6   | 501 (–)                                                                    | 638 (2)                                                                  | 3.75                                                                                           | –                         | –                   |      |
| 7   | 525 (-2)                                                                   | 578 (–)                                                                  | 1.1                                                                                            | –                         | –                   |      |
| 8   | 557 (-1)                                                                   | 601 (-114)                                                               | 2.09                                                                                           | –                         | –                   |      |
| 9   | 524 (28)                                                                   | 596 (-33)                                                                | 3.47                                                                                           | –                         | –                   |      |
| 10  | 509 (9)                                                                    | 569 (-86)                                                                | 11                                                                                             | –                         | –                   |      |
| 11  | 510 (7)                                                                    | 655 (-17)                                                                | 5.25                                                                                           | –                         | –                   |      |
| 12  | 528 (1)                                                                    | 655 (33)                                                                 | 10.6                                                                                           | –                         | –                   |      |
| 13  | 518 (-10)                                                                  | 632 (3)                                                                  | 0.678                                                                                          | –                         | –                   |      |
| 46  | 618 (46)                                                                   | 653 (11)                                                                 | 7.90                                                                                           | –                         | –                   | [65] |
| 47  | 607 (1)                                                                    | 638 (10)                                                                 | 1.20                                                                                           | –                         | –                   |      |
| 52  | 584                                                                        | 608                                                                      | 100                                                                                            | $3.5 \times 10^5$         | 5.4/16.6            | [79] |
| 58  | 670 (12)                                                                   | 695 (22)                                                                 | 19.5                                                                                           | –                         | –                   | [65] |
| 59  | 557 (7)                                                                    | 590 (15)                                                                 | 14.1                                                                                           | –                         | –                   |      |
| 69  | 509 (7)                                                                    | 525 (10)                                                                 | 16                                                                                             | $1.45 - 1.59 \times 10^5$ | –                   | [75] |
| 70  | 680 (14)                                                                   | 701 (1)                                                                  | 11                                                                                             | $1.83 - 3.02 \times 10^5$ | –                   | [77] |
| 71  | 678 (14)                                                                   | 699 (-1)                                                                 | 7.75                                                                                           | $7.6 - 9.2 \times 10^4$   | –                   |      |
| 72  | 674 (12)                                                                   | 700 (2)                                                                  | 10.3                                                                                           | $3.14 - 3.88 \times 10^4$ | –                   |      |
| 73  | 675 (13)                                                                   | 702 (6)                                                                  | 7.75                                                                                           | $1.26 - 1.71 \times 10^4$ | –                   |      |
| 79  | 596 (20)                                                                   | 596 (-13)                                                                | 53                                                                                             | $4.1 \times 10^5$         | 1.73/5.7            | [79] |
| 80  | 570 (10)                                                                   | 597 (14)                                                                 | 41                                                                                             | $4.9 \times 10^4$         | 5.8/17.3            |      |

**Table S3.** Spectral-fluorescent properties of trimethine cyanine dyes in a complex with HSA (in the presence of high concentrations of HSA): maxima of the absorption and fluorescence spectra  $\lambda_{\text{abs}}(\text{HSA})$  and  $\lambda_{\text{fl}}(\text{HSA})$ , respectively, spectral shifts upon the interaction with HSA  $\Delta\lambda_{\text{abs}}$  and  $\Delta\lambda_{\text{fl}}$ , ratios of fluorescence intensities/quantum yields in the presence and in the absence of HSA  $I_{\text{fl}}(\text{HSA})/I_{\text{fl}0}$  or  $\Phi_{\text{fl}}(\text{BSA})/\Phi_{\text{fl}0}$ ; as well as dye–HSA binding constants  $K_{\text{b}}$  and limits of detection/quantification of HSA LOD/LOQ using the dyes as probes

| Dye | $\lambda_{\text{abs}}(\text{HSA})$<br>( $\sim\Delta\lambda_{\text{abs}}$ ) | $\lambda_{\text{fl}}(\text{HSA})$<br>( $\sim\Delta\lambda_{\text{fl}}$ ) | $I_{\text{fl}}(\text{HSA})/I_{\text{fl}0}$<br>$\Phi_{\text{fl}}(\text{HSA})/\Phi_{\text{fl}0}$ | $K_{\text{b}}$            | LOD/LOQ              | Ref.     |
|-----|----------------------------------------------------------------------------|--------------------------------------------------------------------------|------------------------------------------------------------------------------------------------|---------------------------|----------------------|----------|
|     | nm                                                                         |                                                                          |                                                                                                | L mol <sup>-1</sup>       | nmol L <sup>-1</sup> |          |
| 15  | 565 (12)                                                                   | –                                                                        | –                                                                                              | $1.05 - 1.74 \times 10^4$ | –                    | [15]     |
| 19  | 563 (21)                                                                   | –                                                                        | –                                                                                              | $1.0 \times 10^4$         | –                    |          |
| 52  | 604 (12)                                                                   | 616 (-44)                                                                | 885                                                                                            | $3.7 \times 10^7$         | 0.79/2.6             | [78, 79] |
| 53  | 610 (11)                                                                   | –                                                                        | 718                                                                                            | $>10^6$                   | 1.83/6.0             | [15, 78] |
| 60  | 558 (10)                                                                   | –                                                                        | –                                                                                              | $3.0 - 6.0 \times 10^7$   | –                    | [15]     |
| 61  | 574 (12)                                                                   | –                                                                        | –                                                                                              | $4.9 - 5 \times 10^7$     | –                    |          |
| 64  | 567 (10)                                                                   | –                                                                        | –                                                                                              | $3.5 \times 10^3$         | –                    |          |
| 66  | 566 (9)                                                                    | –                                                                        | –                                                                                              | $2.0 - 3.0 \times 10^6$   | –                    |          |
| 69  | 513 (15)                                                                   | 529 (15)                                                                 | 15.5                                                                                           | $2.23 \times 10^5$        | 32/105               | [74, 78] |
| 78  | 563 (11)                                                                   | –                                                                        | 45.4                                                                                           | $1.09 \times 10^5$        | 4.2/14.7             | [78]     |
| 79  | 606 (30)                                                                   | 620 (11)                                                                 | 119                                                                                            | $4.3 \times 10^5$         | 1.4/4.6*             | [79]     |
| 80  | 592 (32)                                                                   | 606 (23)                                                                 | 183                                                                                            | $2.1 \times 10^6$         | 0.35/1.14*           |          |
| 82  | 529 (-27)                                                                  | 561                                                                      | –                                                                                              | $7.54 \times 10^5$        | –                    | [84]     |
| 83  | 531 (-25)                                                                  | 605                                                                      | –                                                                                              | $8.75 \times 10^5$        | –                    |          |
| 84  | 532 (-31)                                                                  | 565                                                                      | –                                                                                              | $8.03 \times 10^5$        | –                    |          |
| 85  | 569 (-27)                                                                  | 603                                                                      | –                                                                                              | $3.25 \times 10^5$        | –                    |          |
| 86  | 572 (-28)                                                                  | 605                                                                      | –                                                                                              | $8.33 \times 10^5$        | –                    |          |
| 87  | 572 (-45)                                                                  | 607                                                                      | –                                                                                              | $4.13 \times 10^5$        | –                    |          |
| 88  | 764 (-4)                                                                   | 771                                                                      | –                                                                                              | $1.55 \times 10^5$        | –                    |          |
| 89  | 758 (-12)                                                                  | 774                                                                      | –                                                                                              | $1.06 \times 10^6$        | –                    |          |
| 90  | 758 (-15)                                                                  | 775                                                                      | –                                                                                              | $3.51 \times 10^5$        | –                    |          |

\* In  $\mu\text{g mL}^{-1}$
